# Supplementary material for: CD19 CAR T cell product and disease attributes predict leukemia remission durability
Source: JCI journal article supplement (doi:10.1172/jci125423), 2019-03-12
Supplement: sd2 [file 2]

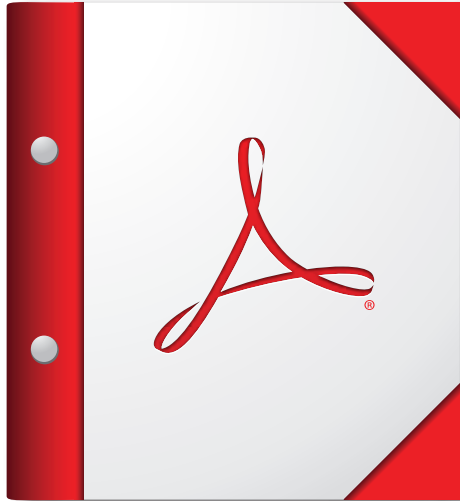

**For the best experience, open this PDF portfolio in  
Acrobat X or Adobe Reader X, or later.**

[Get Adobe Reader Now!](#)
